# Supplementary material for: Liposomal PHD2 Inhibitors and the Enhanced Efficacy in Stabilizing HIF-1α
Source: MDPI journal article supplement (doi:10.3390/nano12010163), 2022-01-03
Supplement: s1 [file s1]

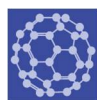

## Article

# Liposomal PHD2 Inhibitors and the Enhanced Efficacy in Stabilizing HIF-1 $\alpha$

Cheng-Bang Jian <sup>1,2,3</sup>, Xu-En Yu <sup>1,4</sup>, Hua-De Gao <sup>1,2</sup>, Huai-An Chen <sup>1</sup>, Ren-Hua Jheng <sup>1,4</sup>, Chong-Yan Chen <sup>1</sup> and Hsien-Ming Lee <sup>1,\*</sup>

<sup>1</sup> Institute of Chemistry, Academia Sinica, Taipei 11529, Taiwan; r01223223@ntu.edu.tw (C.-B.J.); allenyu2932@gmail.com (X.-E.Y.); student719@msn.com (H.-D.G.); eam012331@gmail.com (H.-A.C.); renhuajheng@gmail.com (R.-H.J.); andy6111ha@gmail.com (C.-Y.C.)

<sup>2</sup> Department of Chemistry, National Taiwan University, Taipei 10617, Taiwan

<sup>3</sup> Nano Science and Technology Program, Taiwan International Graduate Program, Academia Sinica and National Taiwan University, Taipei 11529, Taiwan

<sup>4</sup> Department of Chemistry, National Central University, Taoyuan City 320317, Taiwan

\* Correspondence: leehm@chem.sinica.edu.tw; Tel.: +886-2-5572-8620

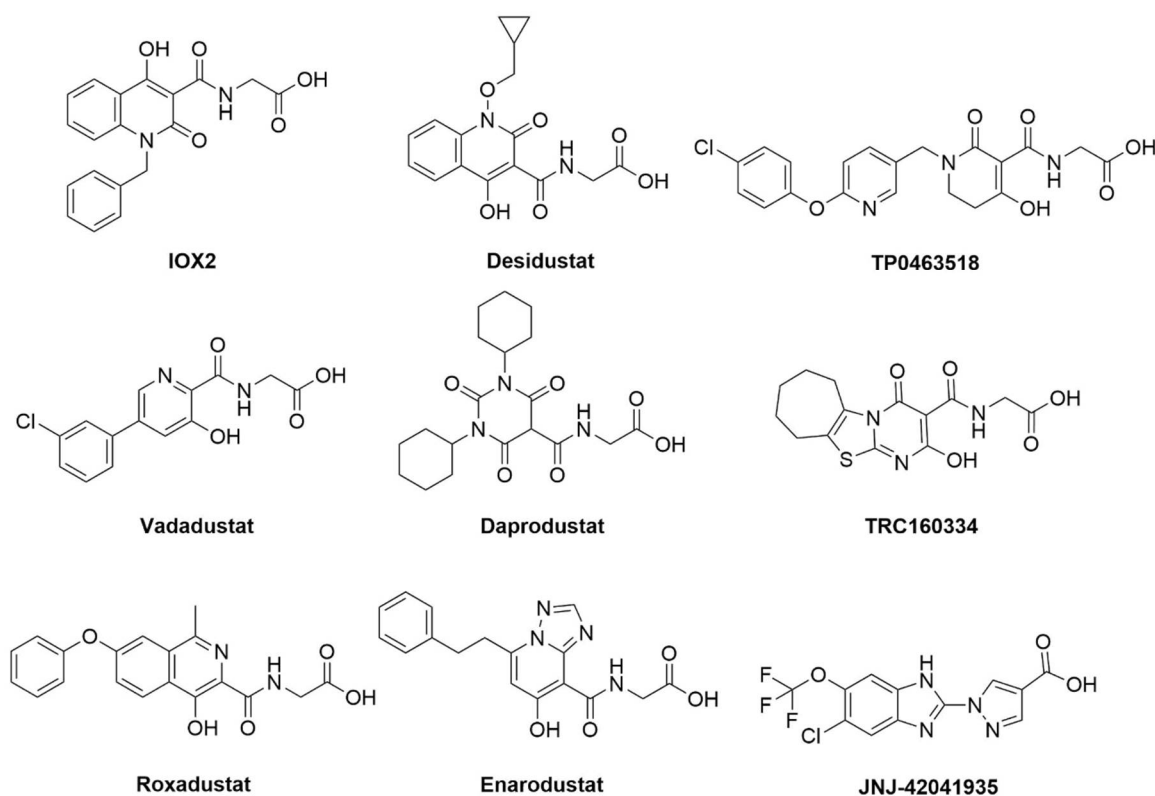

Figure S1. Examples of PHD2 inhibitors with similar pharmacophore features.

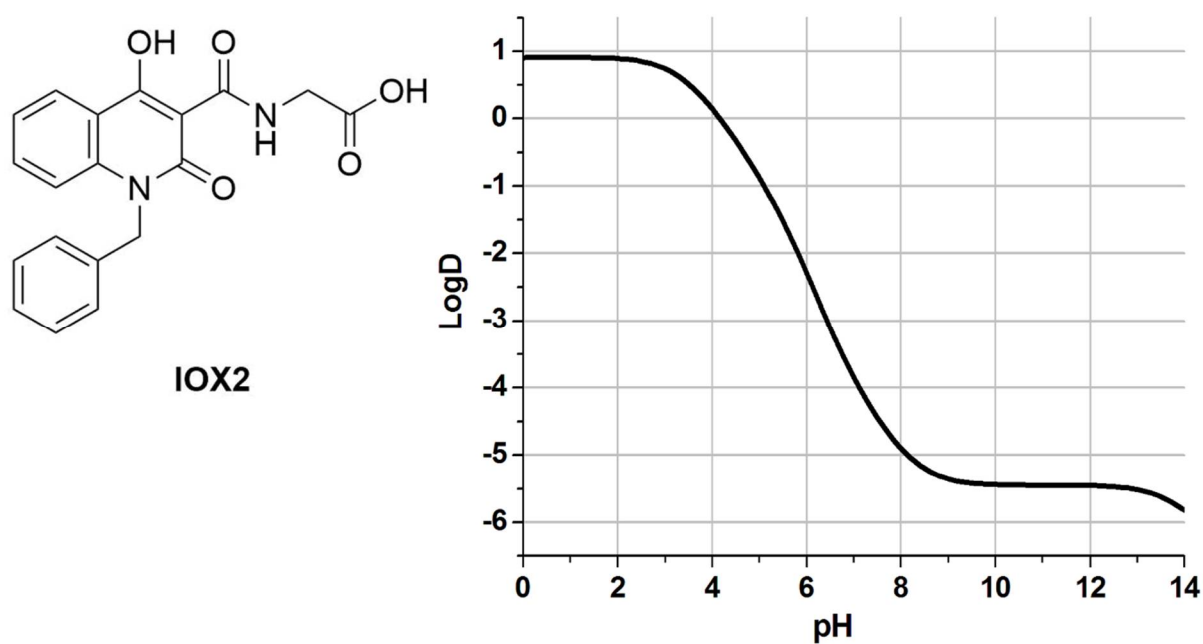

Figure S2. LogD profile for IOX2 calculated by ChemAxon software [1].

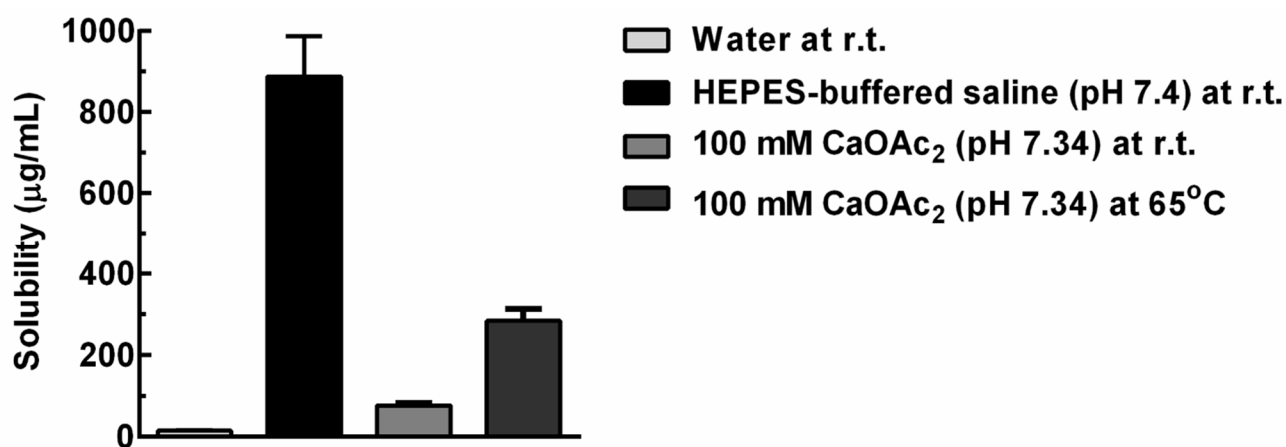

Figure S3. IOX2 solubility values in various media at room temperature (r.t.) and an elevated temperature (65 °C).

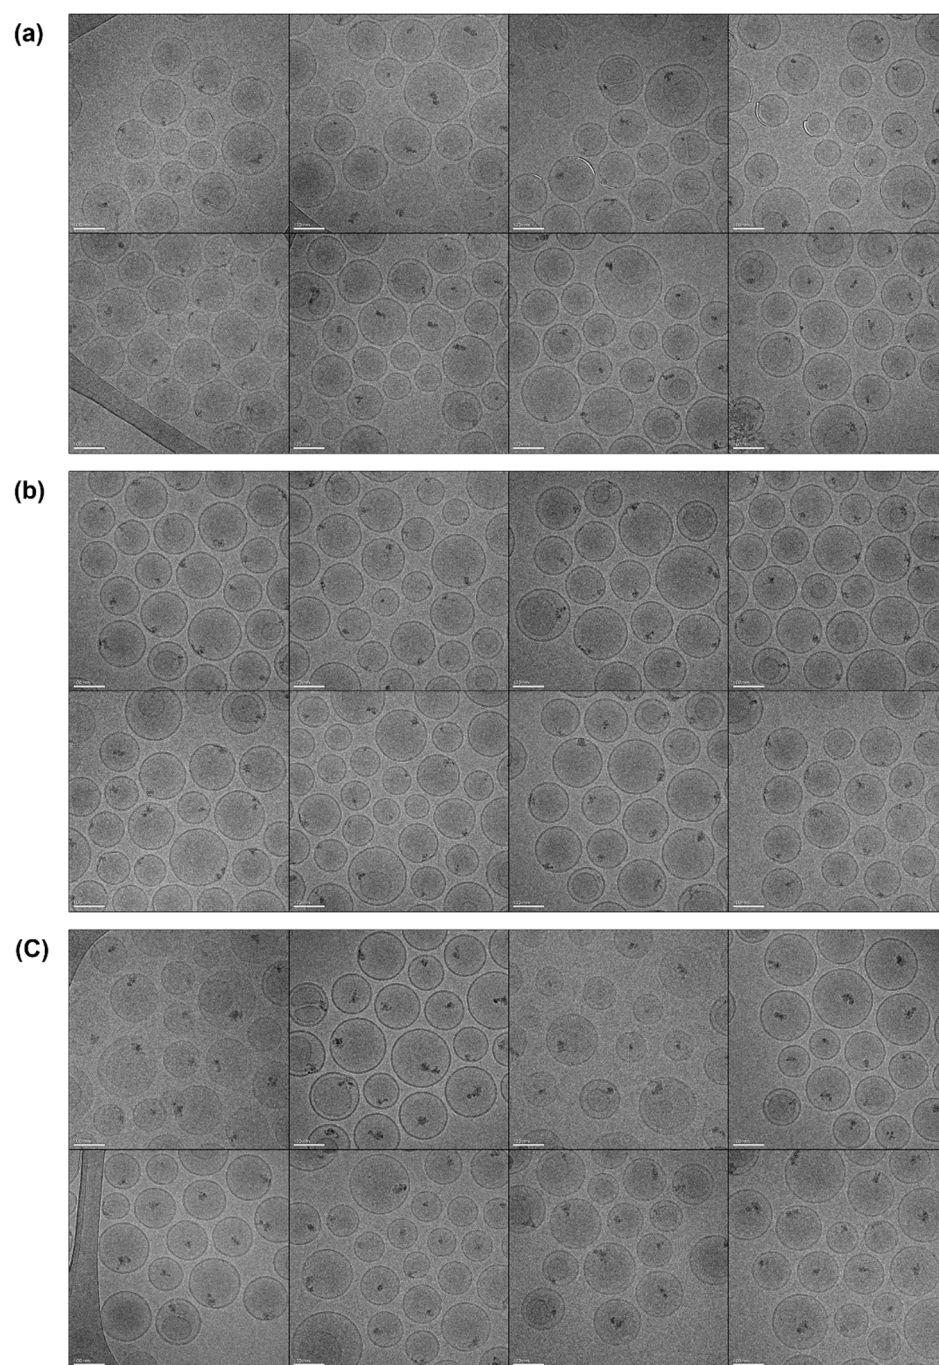

**Figure S4.** Cryo-EM images of IOX2-liposomes showing the dose-dependent Ca-IOX2 precipitate formation in the IOX2-liposomes at drug-to-lipid molar ratios of (a) 0.02, (b) 0.04, and (c) 0.08. The scale bars represent 100 nm.

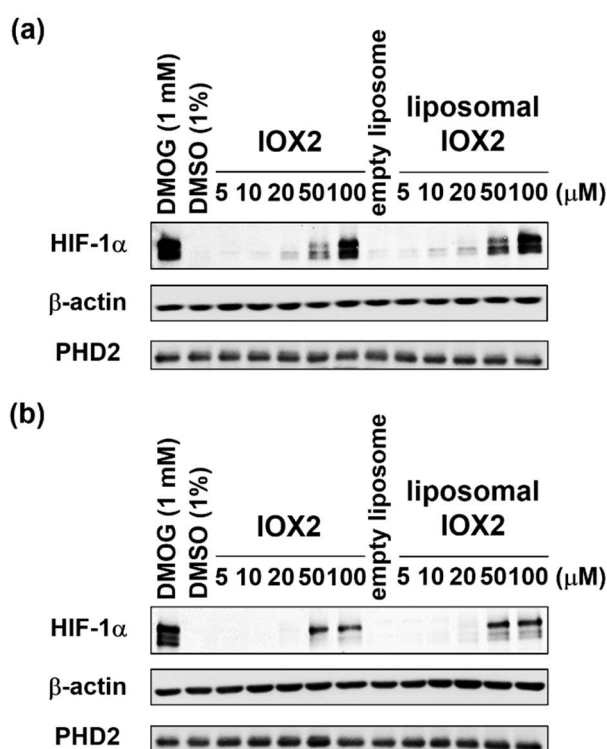

**Figure S5.** HIF-1α protein levels in HeLa cells stabilized by free IOX2 and liposomal IOX2 at (a) 6 h and (b) 24 h. The time-dependent results showed the decreased drug effects in both treatment groups at 24 h, suggesting that the peak of IOX2 uptake and metabolism occurs sooner than 24 h.

**Table S1.** Particle size and ζ-potential analyses of IOX2-liposomes.

| Liposome Composition                                                                  |                | Particle Size (nm) | PDI           | ζ-Potential (mV) |
|---------------------------------------------------------------------------------------|----------------|--------------------|---------------|------------------|
| DSPC/cholesterol/DSPE-PEG <sub>2000</sub> =45:50:5                                    | Before loading | 116.4 ± 1.1        | 0.106 ± 0.028 | -1.53 ± 1.12     |
|                                                                                       | Blank loading  | 110.9 ± 2.8        | 0.067 ± 0.027 | -1.08 ± 1.61     |
|                                                                                       | IOX2 loading   | 109.3 ± 1.1        | 0.070 ± 0.011 | -2.02 ± 0.88     |
| DSPC/cholesterol/DSPE-PEG <sub>2000</sub> /DSPE-PEG <sub>2000</sub> -folate=45:50:4:1 | Before loading | 113.5 ± 2.2        | 0.188 ± 0.011 | -3.08 ± 0.87     |
|                                                                                       | Blank loading  | 100.3 ± 1.7        | 0.075 ± 0.018 | -3.48 ± 1.50     |
|                                                                                       | IOX2 loading   | 98.0 ± 0.7         | 0.072 ± 0.015 | -3.07 ± 0.74     |

## References

1. ChemAxon, Chemicalized - Instant Cheminformatics Solutions. 2021. Available online: <https://chemicalize.com/welcome> (accessed on 3 November 2021)
